# Supplementary material for: Design of organic structure directing agents to control the synthesis of zeolites for carbon capture and storage
Source: Royal Society of Chemistry journal article supplement (doi:10.1039/c9ra09675b), 2019-01-01
Supplement: c9ra09675b1.pdf [file c9ra09675b1.pdf]

# Supplementary Information

*Table S1: Selection of organic synthesis reactions used by the de novo design program to generate OSDAs.*

| Mnemonic          | Reactants                     | Product                                          | Description                          |
|-------------------|-------------------------------|--------------------------------------------------|--------------------------------------|
| AMIDEFROMACID     | $R_1C=OOH, R_2NH_2$           | $R_1-NHC=O-R_2$                                  | Amide from acid and aliphatic amine  |
| REDUCECYAN        | $RC\#N$                       | $R-CN H_2$                                       | Red.Am. Fully reduce CN to amine     |
| WITTIG            | $R_1CXR_2, R_3C=OR_4$         | $R_{1,2}C=CR_{3,4}$                              | Wittig alkene synthesis              |
| NH2FROMNITRO      | $RNO_2$                       | $RNH_2$                                          | Reduce nitro group                   |
| AMINEFROMAMIDE    | $R_1C=ONR_{2,3}$              | $R_1CH_2NR_{2,3}$                                | Red.Am. Reduce amide group           |
| AMINEFROMACID     | $RC=OOH$                      | $RNH_2$                                          | Schmidt Reaction, reduce acid group  |
| AMINEFROMALDOKETO | $R_1C=OR_2$                   | $R_1CHNH_2R_2$                                   | Reductive amination from carbonyl    |
| FCACYLATION       | Aryl, $R_2C=OX$               | $Ar1C=OR_2$                                      | Friedel-Crafts acylation             |
| DEOXYALDOKETO     | $R_1C=OR_2$                   | $R_1CH_2R_2$                                     | Aldol/Ketone deoxygenation           |
| REDALDOKETO       | $R_1C=OR_2$                   | $R_1CHOHR_2$                                     | Reduction of aldol/ketone to alcohol |
| GABRIEL           | $RX$                          | $RNH_2$                                          | Alkyl-NH2 from halide                |
| ALKYNECOUPLING    | $R_1C\#CH, R_2C\#CH$          | $R_1C\#CC\#CR_2$                                 | Alkyne coupling                      |
| APPEL             | $ROH$                         | $RX$                                             | Appel reaction                       |
| BARTOLIINDOLE     | $R_1NO_2Phe, XR_2C=CR_3$      | $R_{1,2,3}$ Indole                               | Bartoli indole synthesis             |
| BUCHWALDHARTWIG   | $ArX, R_1NHR_2$               | $ArNR_{1,2}$                                     | Buchwald Hartwig coupling            |
| ALKENETOALKANE    | $R_{1,2}C=CR_{3,4}$           | $R_{12}CHCHR_{34}$                               | Reduction of alkene                  |
| COREYFUCHS        | $RHC=O$                       | $RC\#CH$                                         | Corey-Fuchs alkyne synthesis         |
| ALKYNETOALKENE    | $R_1C\#CR_2$                  | $R_1HC=CHR_2$                                    | Reduction of alkyne to alkene        |
| ALKYNETOALKANE    | $R_1C\#CR_2$                  | $R_1H_2CCH_2R_2$                                 | Reduction of alkyne to alkane        |
| ALKYNESN2         | $R_1C\#CH, R_2X$              | $R_1C\#CR_2$                                     | SN2 displacement of alkyne           |
| OHTOBR            | $ROH$                         | $RBr$                                            | Bromide synthesis                    |
| OHTOI             | $ROH$                         | $RI$                                             | Iodide synthesis                     |
| BENZYLTOCHLORIDE  | $ArCH_3$                      | $ArCH_2Cl$                                       | Benzyl halogenization                |
| BENZYLTOBROMIDE   | $ArCH_3$                      | $ArCH_2Br$                                       | Benzyl halogenization                |
| HALOTOCYANIDE     | $RX$                          | $RC\#N$                                          | Cyanide from halide                  |
| SONOGASHIRA       | $R_1C\#CH, R_2X$              | $R_1C\#CR_2$                                     | Sonogashira coupling                 |
| LAROCKINDOLE      | $ArINHR_1, R_2C\#CR_3$        | $R_{123}$ indol                                  | Larock indole synthesis              |
| SUZUKI            | borate, halogenide            | Alkyl/aryl <sub>1</sub> -Alkyl/aryl <sub>2</sub> | Suzuki coupling                      |
| NHALKYLATION      | aromatic N-H, $RX$            | $ArN-R, ArN = imidazole, \dots$                  | Alkylation of arom. N with Grignard  |
| FISCHERINDOLE     | Hydrazine, carbonyl           | indole                                           | Fischer indole synthesis             |
| MENSHUTKIN        | $R1R2R3N, R4X$                | Quaternary amine                                 | Menshutkin reaction                  |
| SKRAUP            | anyline with alpha-CH         | quinoline                                        | Skraup reaction                      |
| SUZUKIMIYAUURA    | 2x Alkyl/aryl <sub>1</sub> -X | Alkyl/aryl <sub>1</sub> -Alkyl/aryl <sub>2</sub> | Suzuki-Miyaura reaction              |
| ESCHWEILERCLARKE  | prim./sec. amine              | methyl-substituted amine                         | Eschweiler-Clarke reaction           |
| PYRIMIDINIUM      | pyridine, SN2-halogenide      | pyrimidinium cation                              | alkylated pyridine (pyridinium ion)  |
| ALKYLATEN         | amine, MeI or EtI             | methyl or ethyl amine                            | fully methylate or ethylate an amine |

| Mnemonic        | Reactants                  | Product                         | Description                     |
|-----------------|----------------------------|---------------------------------|---------------------------------|
| KNORRPYRAZOLE   | RC(=O)CC(=O)R, Hydrazin    | Pyrazole                        | Knorr Pyrazole synthesis        |
| ALKYLATENP      | aromatic N, SN2 halegonide | N-alklated aromatic heterocycle | Alkylation of aromatic nitrogen |
| CXBORYLATION    | prim./sec. halogenide      | alkyl-B(OH) <sub>2</sub>        | Boronation of halogenide        |
| ALKYLATESECAM   | sec. amine                 | prim./sec. halogenide           | Alkylation of sec. amine        |
| ALKYLATENPORNPH | aromatic N or NH           | prim./sec. halogenide           | Alkylation of aromatic amine    |
| PYRIDINETOC     | pyridine                   | phenyl equivalent               | Replace pyridine with phenyl    |

Table S2: Results of the 52 de novo design runs to generate OSDAs for the seven target zeolites. The nine columns display the number of the run (column 1), the name of the target zeolite (column 2), the number of OSDA copies fitted in the target zeolite (column 3), the shelf used (column 4), the stabilization energy of the most favorable scoring molecule found in the run (column 5), the number of MD simulations carried out in the run (column 6), the number of OSDAs found with a stabilization energy below 0 kJ/(mol Si) (column 7), the number of OSDAs found with a stabilization energy within 2 kJ/(mol Si) from the stabilization energy of the most favorably scoring OSDA (column 8), and the identifier and 2D structure of the most favorably scoring OSDA found in the run (column 9). If an expanded unit cell was used in a run, this is indicated in parenthesis in column 2.

| run | target           | osda copies | shelf | best score       | MD runs | <0 kJ/(mol Si) | within 2 kJ/(mol Si) | best OSDA                                                                                          |
|-----|------------------|-------------|-------|------------------|---------|----------------|----------------------|----------------------------------------------------------------------------------------------------|
| 1   | 8124767          | 3           | 1tor  | -3.0 kJ/(mol Si) | 3198    | 12             | 10                   | Syn004317<br> |
| 2   | 8124767          | 4           | 1tor  | -0.5 kJ/(mol Si) | 3429    | 1              | 4                    | Syn040158<br> |
| 3   | 8124767          | 4           | 1tor  | -0.6 kJ/(mol Si) | 3926    | 2              | 10                   | Syn018621<br> |
| 4   | 8124767<br>(112) | 2           | 1tor  | -3.1 kJ/(mol Si) | 4198    | 376            | 125                  | Syn041716<br> |

| run | target        | osda copies | shelf | best score       | MD runs | <0 kJ/(mol Si) | within 2 kJ/(mol Si) | best OSDA                                                                                          |
|-----|---------------|-------------|-------|------------------|---------|----------------|----------------------|----------------------------------------------------------------------------------------------------|
| 5   | 8124767 (112) | 3           | 1tor  | -3.5 kJ/(mol Si) | 3781    | 199            | 54                   | Syn020911<br>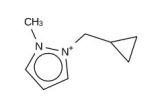   |
| 6   | 8124767 (112) | 4           | 1tor  | -3.5 kJ/(mol Si) | 3524    | 68             | 23                   | Syn010119<br>   |
| 7   | 8124767 (112) | 6           | 1tor  | -3.8 kJ/(mol Si) | 3319    | 15             | 4                    | Syn040165<br>   |
| 8   | 8124767       | 4           | MS05  | -7.2 kJ/(mol Si) | 1089    | 13             | 1                    | Syn034587<br>   |
| 9   | 8124767       | 4           | MS05  | -7.4 kJ/(mol Si) | 1189    | 13             | 1                    | Syn014680<br> |
| 10  | 8124767       | 4           | MS05  | -7.3 kJ/(mol Si) | 1248    | 13             | 1                    | Syn043731<br> |
| 11  | 8124767       | 4           | MS10  | 0.4 kJ/(mol Si)  | 6301    | 0              | 9                    | Syn019677<br> |
| 12  | 8124767 (112) | 4           | MS10  | -4.4 kJ/(mol Si) | 7144    | 232            | 22                   | Syn094775<br> |
| 13  | 8277563       | 8           | MS_05 | -9.9 kJ/(mol Si) | 1240    | 113            | 11                   | Syn003616<br> |

| run | target  | osda copies | shelf | best score        | MD runs | <0 kJ/(mol Si) | within 2 kJ/(mol Si) | best OSDA                                                                                        |
|-----|---------|-------------|-------|-------------------|---------|----------------|----------------------|--------------------------------------------------------------------------------------------------|
| 14  | 8277563 | 8           | MS_05 | -9.4 kJ/(mol Si)  | 1381    | 123            | 12                   | Syn018987<br>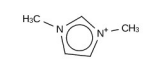 |
| 15  | 8277563 | 8           | MS_05 | -9.8 kJ/(mol Si)  | 1131    | 102            | 13                   | Syn003646<br> |
| 16  | 8277563 | 8           | MS_05 | -9.6 kJ/(mol Si)  | 1160    | 101            | 15                   | Syn119920<br> |
| 17  | 8277563 | 8           | MS_05 | -9.9 kJ/(mol Si)  | 1240    | 113            | 14                   | Syn003616<br> |
| 18  | 8277563 | 8           | MS_05 | -9.5 kJ/(mol Si)  | 1160    | 114            | 13                   | Syn007701<br> |
| 19  | 8277563 | 8           | MS_05 | -9.9 kJ/(mol Si)  | 1024    | 95             | 10                   | Syn006053<br> |
| 20  | 8277563 | 8           | MS_06 | -10.3 kJ/(mol Si) | 2193    | 168            | 11                   | Syn004112<br> |
| 21  | 8277563 | 8           | MS_07 | -11.1 kJ/(mol Si) | 3963    | 318            | 15                   | Syn011234<br> |
| 22  | 8277563 | 8           | MS_08 | -10.7 kJ/(mol Si) | 5461    | 285            | 25                   | Syn001729<br> |

| run | target  | osda copies | shelf | best score        | MD runs | <0 kJ/(mol Si) | within 2 kJ/(mol Si) | best OSDA                                                                                          |
|-----|---------|-------------|-------|-------------------|---------|----------------|----------------------|----------------------------------------------------------------------------------------------------|
| 23  | 8277563 | 8           | MS_09 | -10.5 kJ/(mol Si) | 6346    | 366            | 28                   | Syn061594<br>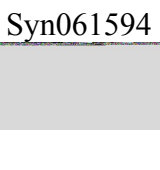   |
| 24  | 8277563 | 8           | MS_10 | -11.1 kJ/(mol Si) | 6655    | 366            | 11                   | Syn144424<br>   |
| 25  | 8277563 | 4           | MS_05 | -9.9 kJ/(mol Si)  | 1271    | 1189           | 238                  | Syn022105<br>   |
| 26  | 8277563 | 4           | MS_05 | -10.4 kJ/(mol Si) | 1669    | 1556           | 238                  | Syn039747<br>   |
| 27  | 8277563 | 4           | MS_05 | -10.5 kJ/(mol Si) | 1805    | 1686           | 225                  | Syn135934<br>  |
| 28  | 8277563 | 4           | MS_10 | -11.1 kJ/(mol Si) | 6487    | 5071           | 755                  | Syn026580<br> |
| 29  | 8277563 | 4           | MS_10 | -11.1 kJ/(mol Si) | 7317    | 5791           | 876                  | Syn125982<br> |
| 30  | 8277563 | 4           | MS_10 | -11.8 kJ/(mol Si) | 7320    | 5800           | 448                  | Syn171369<br> |
| 31  | 8277563 | 2           | MS_10 | -9.3 kJ/(mol Si)  | 6881    | 6569           | 3491                 | Syn175368<br> |

| run | target | osda copies | shelf | best score        | MD runs | <0 kJ/(mol Si) | within 2 kJ/(mol Si) | best OSDA                                                                                          |
|-----|--------|-------------|-------|-------------------|---------|----------------|----------------------|----------------------------------------------------------------------------------------------------|
| 32  | DAC    | 2           | MS_05 | -11.3 kJ/(mol Si) | 1259    | 679            | 22                   | Syn163734<br>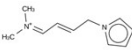   |
| 33  | DAC    | 2           | MS_05 | -11.1 kJ/(mol Si) | 1163    | 633            | 19                   | Syn000651<br>   |
| 34  | DAC    | 2           | MS_05 | -11.2 kJ/(mol Si) | 1232    | 691            | 17                   | Syn004268<br>   |
| 35  | DAC    | 2           | MS_10 | -13.1 kJ/(mol Si) | 6787    | 2424           | 41                   | Syn074271<br>   |
| 36  | DAC    | 2           | MS_10 | -14.2 kJ/(mol Si) | 6952    | 2384           | 20                   | Syn124337<br>   |
| 37  | DAC    | 2           | MS_10 | -13.7 kJ/(mol Si) | 7019    | 2371           | 25                   | Syn120443<br> |
| 38  | DAC    | 2           | MS_15 | -12.9 kJ/(mol Si) | 6087    | 1455           | 17                   | Syn141805<br> |
| 39  | SIV    | 8           | MS_10 | -11.4 kJ/(mol Si) | 6344    | 516            | 17                   | Syn012738<br> |
| 40  | SIV    | 8           | MS_10 | -11.9 kJ/(mol Si) | 4531    | 456            | 10                   | Syn085308<br> |
| 41  | SIV    | 8           | MS10  | -14.1 kJ/(mol Si) | 6533    | 487            | 1                    | Syn170524<br> |

| run | target       | osda<br>copies | shelf | best<br>score     | MD runs | <0<br>kJ/(mol Si) | within 2<br>kJ/(mol Si) | best<br>OSDA                                                                                       |
|-----|--------------|----------------|-------|-------------------|---------|-------------------|-------------------------|----------------------------------------------------------------------------------------------------|
| 42  | GIS          | 2              | MS_10 | -12.0 kJ/(mol Si) | 6782    | 454               | 14                      | Syn191726<br>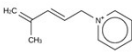   |
| 43  | GIS          | 2              | MS_10 | -10.5 kJ/(mol Si) | 7771    | 376               | 12                      | Syn020151<br>   |
| 44  | GIS          | 2              | MS_10 | -12.8 kJ/(mol Si) | 5088    | 425               | 5                       | Syn075888<br>   |
| 45  | JBW          | 1              | MS_10 | 1.2 kJ/(mol Si)   | 6647    | 0                 | 1                       | Syn014767<br>   |
| 46  | JBW<br>(211) | 1              | MS_10 | -8.4 kJ/(mol Si)  | 7277    | 6                 | 1                       | Syn005431<br> |
| 47  | JBW<br>(211) | 1              | MS_10 | -8.3 kJ/(mol Si)  | 7200    | 7                 | 1                       | Syn004598<br> |
| 48  | JBW<br>(211) | 1              | MS_10 | -13.7 kJ/(mol Si) | 6861    | 8                 | 1                       | Syn032232<br> |
| 49  | JBW<br>(211) | 2              | MS_10 | 30.3 kJ/(mol Si)  | 6686    | 0                 | 1                       | Syn121186<br> |

| run | target | osda copies | shelf | best score        | MD runs | <0 kJ/(mol Si) | within 2 kJ/(mol Si) | best OSDA                                                                                        |
|-----|--------|-------------|-------|-------------------|---------|----------------|----------------------|--------------------------------------------------------------------------------------------------|
| 50  | WEI    | 2           | MS_10 | -16.4 kJ/(mol Si) | 7243    | 2440           | 22                   | Syn129375<br> |
| 51  | WEI    | 2           | MS_10 | -16.3 kJ/(mol Si) | 8100    | 2527           | 18                   | Syn118769<br> |
| 52  | WEI    | 2           | MS_10 | -18.6 kJ/(mol Si) | 6881    | 2319           | 9                    | Syn118466<br> |

Table S3: IZA and theoretical zeolite frameworks for which OSDAs have been designed in this work.

| Framework | Parasitic Energy                | Max. free sphere | Density                   | Energy above quartz |
|-----------|---------------------------------|------------------|---------------------------|---------------------|
| WEI       | 732.44 kJ/(kg CO <sub>2</sub> ) | 3.40 Å           | 16.5 T/1000Å <sup>3</sup> | 34.8 kJ/mol         |
| JBW       | 746.47 kJ/(kg CO <sub>2</sub> ) | 3.66 Å           | 18.8 T/1000Å <sup>3</sup> | 11.0 kJ/mol         |
| GIS       | 793.66 kJ/(kg CO <sub>2</sub> ) | 3.26 Å           | 16.4 T/1000Å <sup>3</sup> | 15.0 kJ/mol         |
| SIV       | 839.32 kJ/(kg CO <sub>2</sub> ) | 3.67 Å           | 16.4 T/1000Å <sup>3</sup> | 15.4 kJ/mol         |
| DAC       | 841.7 kJ/(kg CO <sub>2</sub> )  | 4.13 Å           | 17.5 T/1000Å <sup>3</sup> | 12.3 kJ/mol         |
| 8124767   | 727.96 kJ/(kg CO <sub>2</sub> ) | 3.38 Å           | 17.8 T/1000Å <sup>3</sup> | 14.7 kJ/mol         |
| 8277563   | 735.85 kJ/(kg CO <sub>2</sub> ) | 7.53 Å           | 16.9 T/1000Å <sup>3</sup> | 14.2 kJ/mol         |



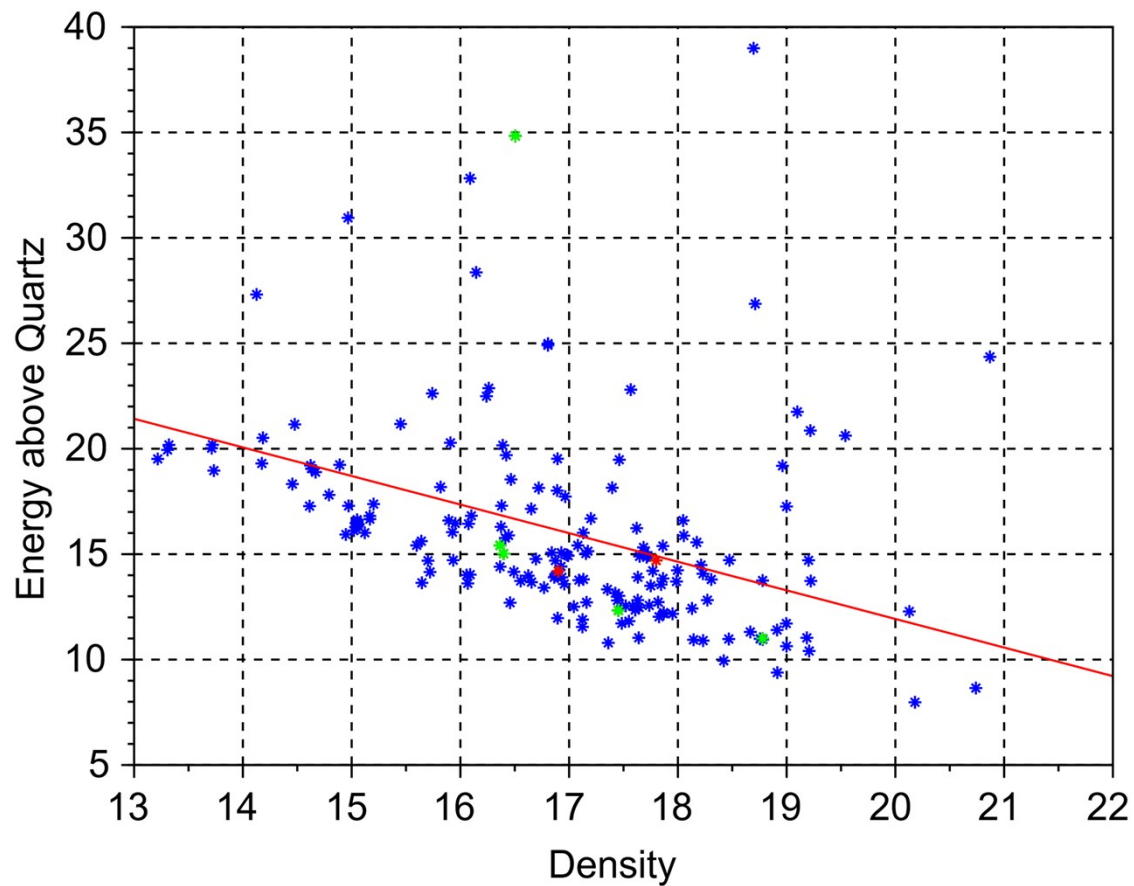

Figure S1: Energy-density plot for the five known target zeolites (green), the two theoretical target zeolites (red), and the other known zeolites with an energy above quartz below 40 kJ/(mol Si) (blue). The energies are in kJ/(mol Si), the densities are in Si atoms per  $\text{\AA}^3$ . The red line is the fit through the energy-density plot of known zeolites.

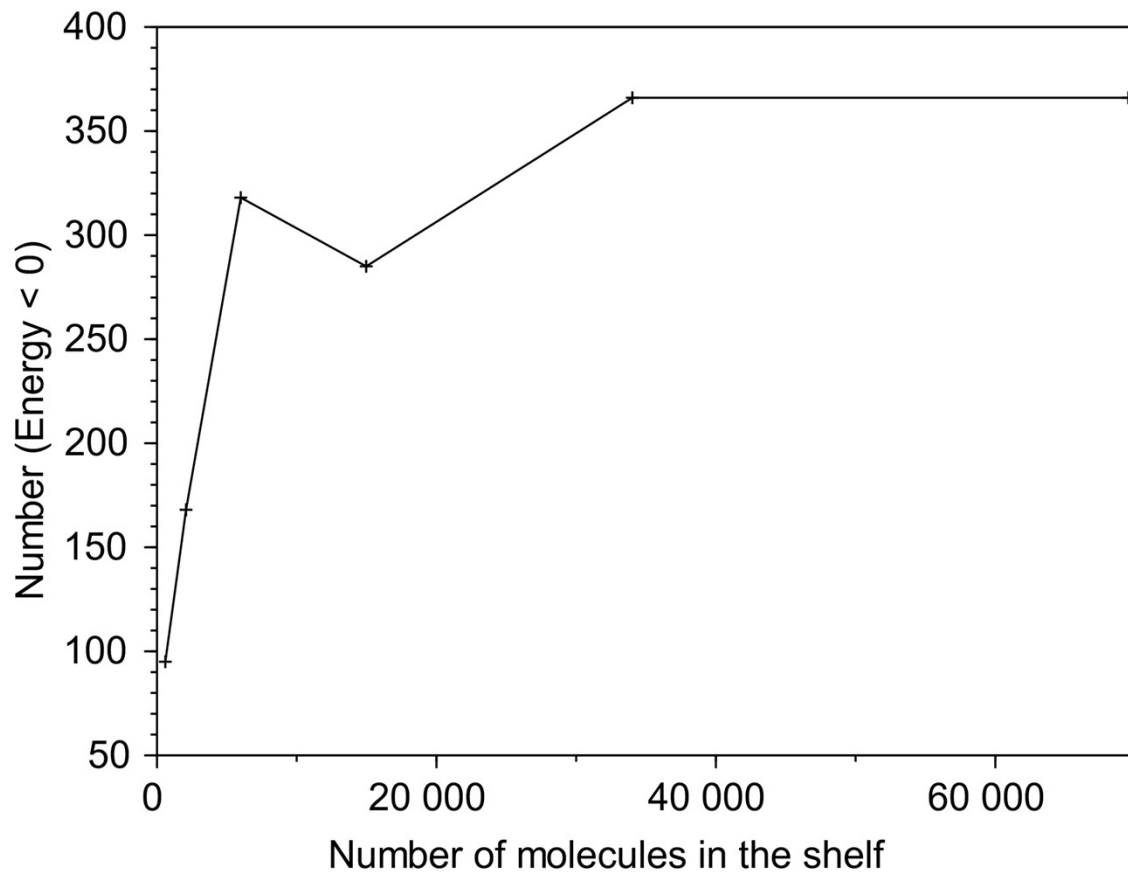

Figure S2: Number of generated OSDAs with a stabilization energy below 0 kJ/(mol Si) versus the number of molecules in the shelf for six runs on 8277563.
